# Supplementary material for: Band-gap engineering of BiOCl with oxygen vacancies for efficient photooxidation properties under visible-light irradiation
Source: Royal Society of Chemistry journal article supplement (doi:10.1039/c7ta09897a), 2017-12-28
Supplement: c7ta09897a1.pdf [file c7ta09897a1.pdf]

## *Supplementary Information*

### **Band-gap engineering of BiOCl by oxygen vacancies for efficient photooxidation properties under visible-light irradiation**

Dandan Cui,<sup>a,b,c,†</sup> Liang Wang,<sup>b,c,†</sup> Kang Xu,<sup>a,c</sup> Long Ren,<sup>b,c</sup> Li Wang,<sup>b,c</sup> Youxing Yu,<sup>d,c</sup> Yi Du,<sup>a,b,c</sup> and Weichang Hao<sup>\*,a,b,c</sup>

<sup>a</sup>Department of Physics and Key Laboratory of Micro-Nano Measurement, Manipulation and Physics, Ministry of Education, Beihang University, Beijing 100191, China.

<sup>b</sup>Institute for Superconducting and Electronic Materials, University of Wollongong, NSW 2500, Australia.

<sup>c</sup>BUAA-UOW Joint Research Centre, Beihang University, Beijing 100191, China.

<sup>d</sup>School of Materials of Science and Engineering, Beihang University, Beijing 100191, China.

\*Corresponding author: [whao@buaa.edu.au](mailto:whao@buaa.edu.au)

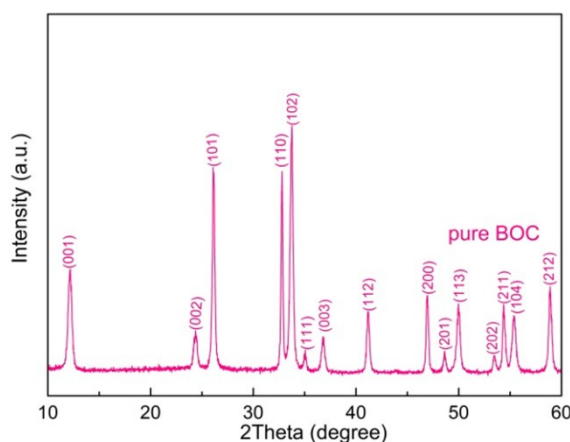

**Fig. S1** XRD patterns of pure BOC.

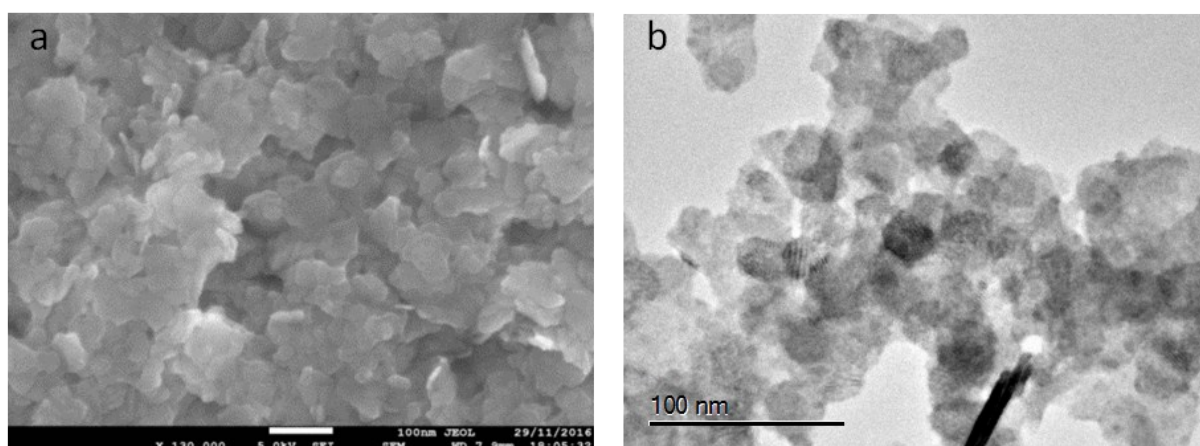

**Fig. S2** (a) SEM and (b) TEM images of OV-rich BOC.

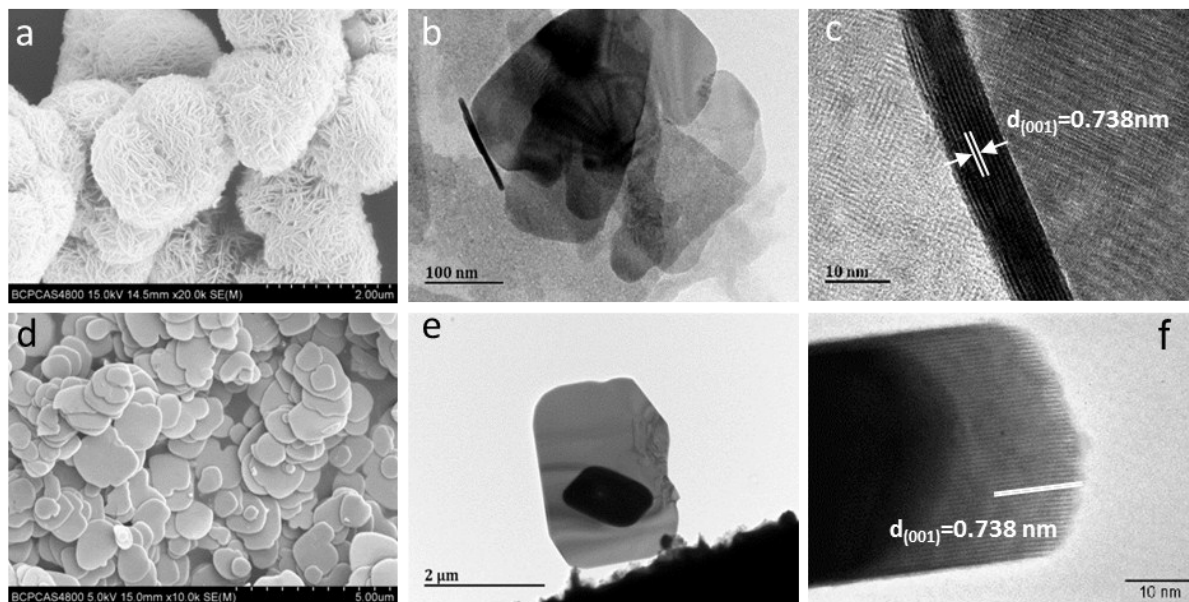

**Fig. S3** SEM images of (a) OV-poor BOC and (d) pure BOC; planar-view TEM images of (b) OV-poor BOC and (e) pure BOC; side-view HRTEM images of (c) OV-poor BOC and (f) pure BOC.

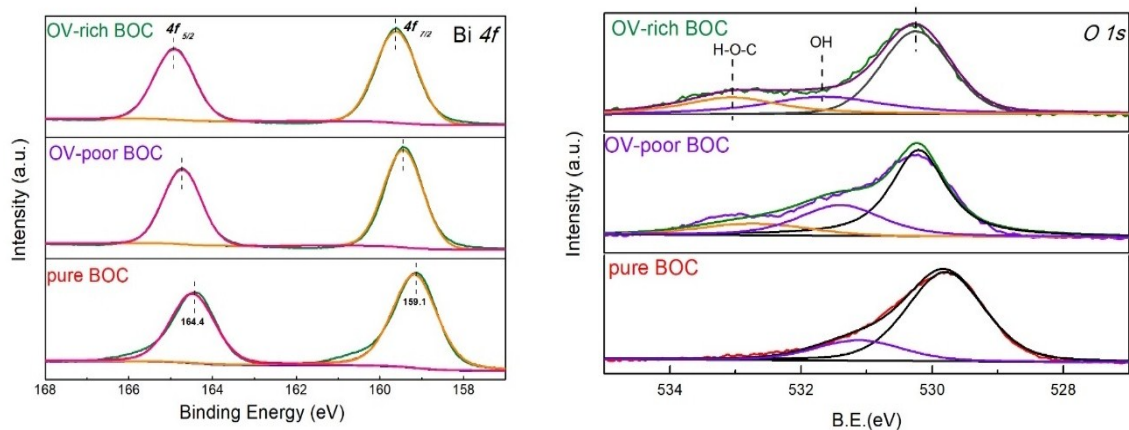

**Fig. S4** (a) High-resolution XPS spectra of Bi 4f and (b) High-resolution XPS spectra of O 1s for the OV-rich, OV-poor and pure BOC samples.

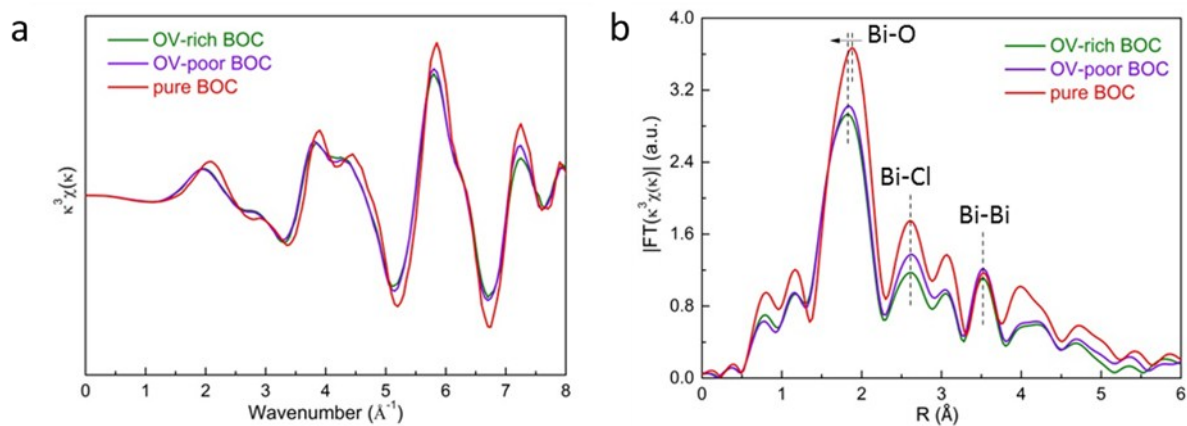

**Fig. S5** (a) Bi L-edge extended XAFS oscillation function  $\kappa^3\chi(\kappa)$  and (b) the corresponding Fourier transforms for the OV rich/poor BOC and pure BOC.

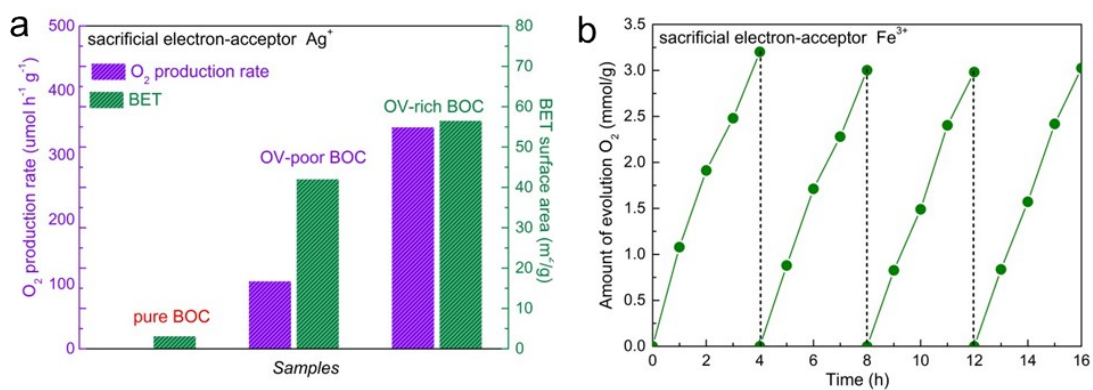

**Fig. S6** (a) comparison of the photocatalytic  $\text{O}_2$  production rate under visible-light irradiation ( $\lambda \geq 420 \text{ nm}$ ) over OV-rich/poor BOC and pure BOC. (b) Cycling test of  $\text{O}_2$  production from water under visible-light irradiation ( $\lambda \geq 420 \text{ nm}$ ) over OV-rich BOC.

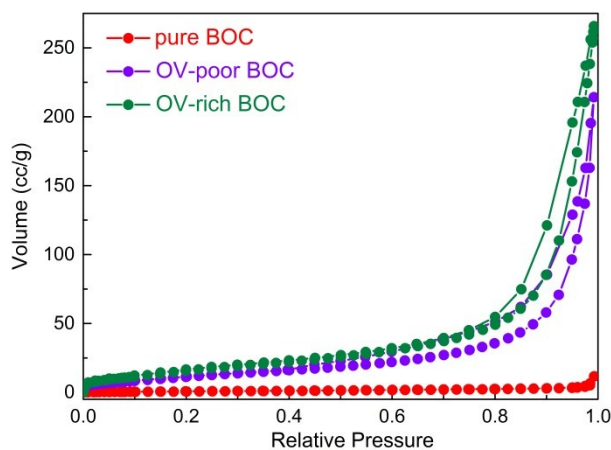

**Fig. S7.** Nitrogen adsorption-desorption isotherms of OV-rich/poor BOC and pure BOC.

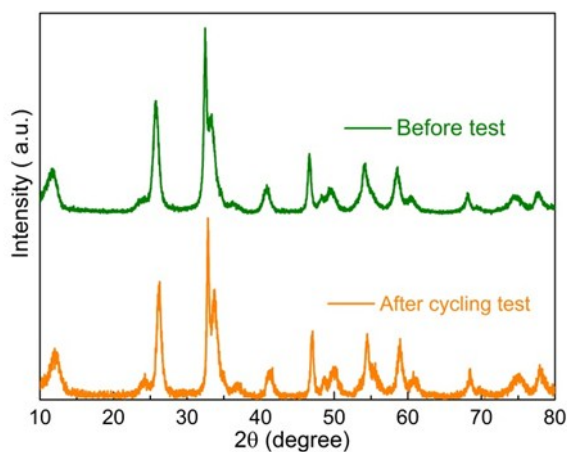

**Fig. S8** XRD patterns of OV-rich BOC before and after the cycling test of O<sub>2</sub> evolution under visible light irradiation.

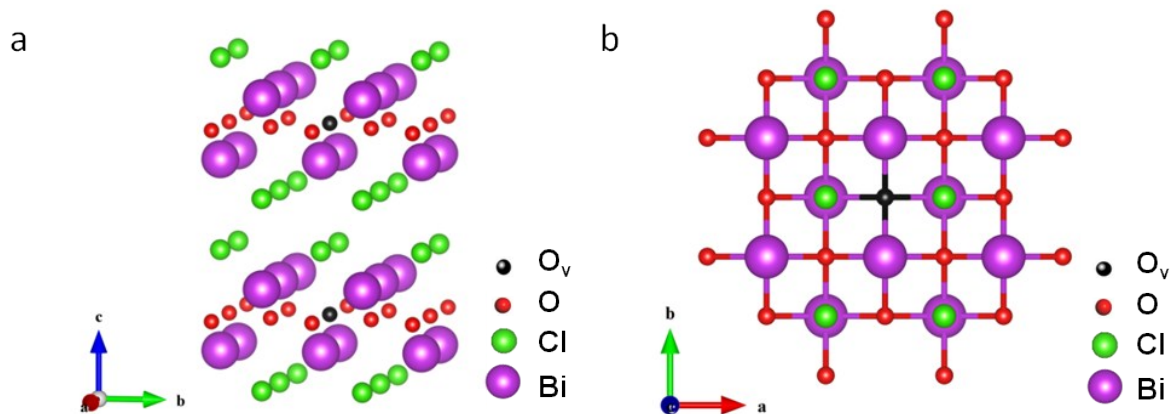

**Fig. S9** Simulated crystal structure of BiOCl with oxygen vacancies: (a) side view and (b) top view of (001) facet.

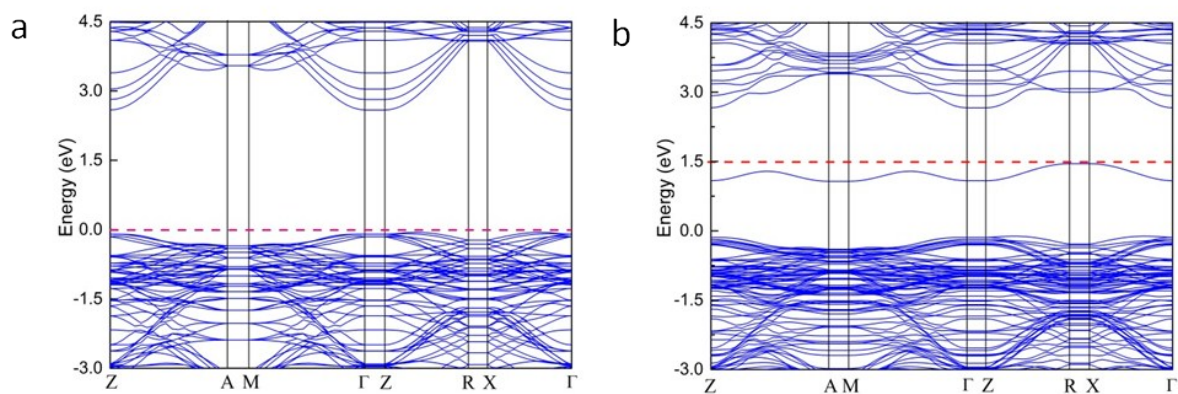

**Fig. S10** Band structure of (a) perfect BiOCl and (b) BiOCl with oxygen vacancies.

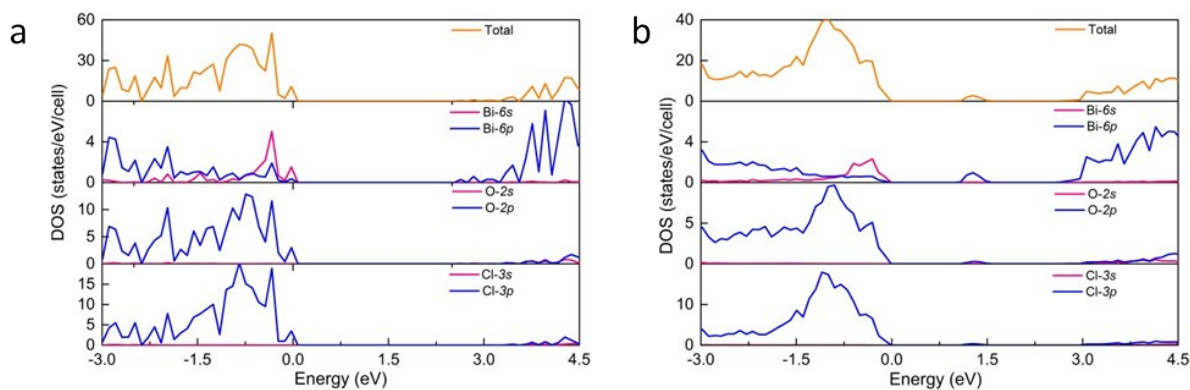

**Fig. S11** Total and partial electronic density of states (DOS) of (a) perfect BiOCl and (b) BiOCl with oxygen vacancies.

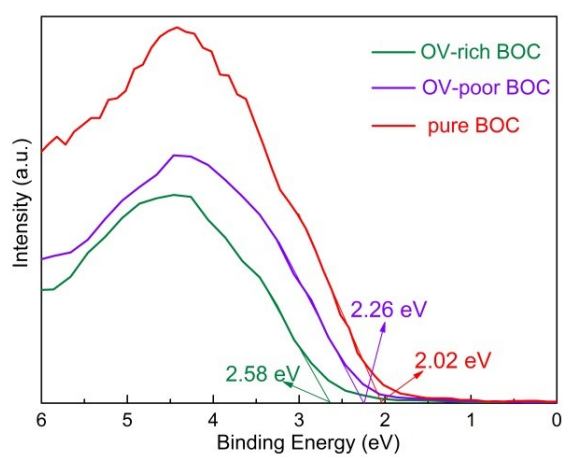

**Fig. S12** XPS valence band spectra of OV-rich/poor BOC and pure BOC.
